# Supplementary material for: Cu-catalyzed debrominative cyanation of gem-dibromoolefins: a facile access to α,β-unsaturated nitriles
Source: Royal Society of Chemistry journal article supplement (doi:10.1039/c5ob00394f), 2015-01-01

**Electronic Supplementary Information(ESI)**

**Cu-catalyzed debrominative cyanation of *gem*-  
dibromoolefins: a facile access to  $\alpha,\beta$ -unsaturated nitriles**

Brij Bhushan Ahuja and Arumugam Sudalai\*

Chemical Engineering & Process Development Division, National Chemical Laboratory, Dr.  
Homi Bhabha Road, Pune-411008 Maharashtra, India. India, Fax: (+) 91-02025902675.

E-mail: a.sudalai@ncl.res.in

**Table of Contents**

| <b><u>Sr.No.</u></b> | <b><u>Description</u></b>                                                 | <b><u>Page No.</u></b> |
|----------------------|---------------------------------------------------------------------------|------------------------|
| <b>1</b>             | <b><math>^1\text{H}</math> and <math>^{13}\text{C}</math> NMR Spectra</b> | <b>2-23</b>            |

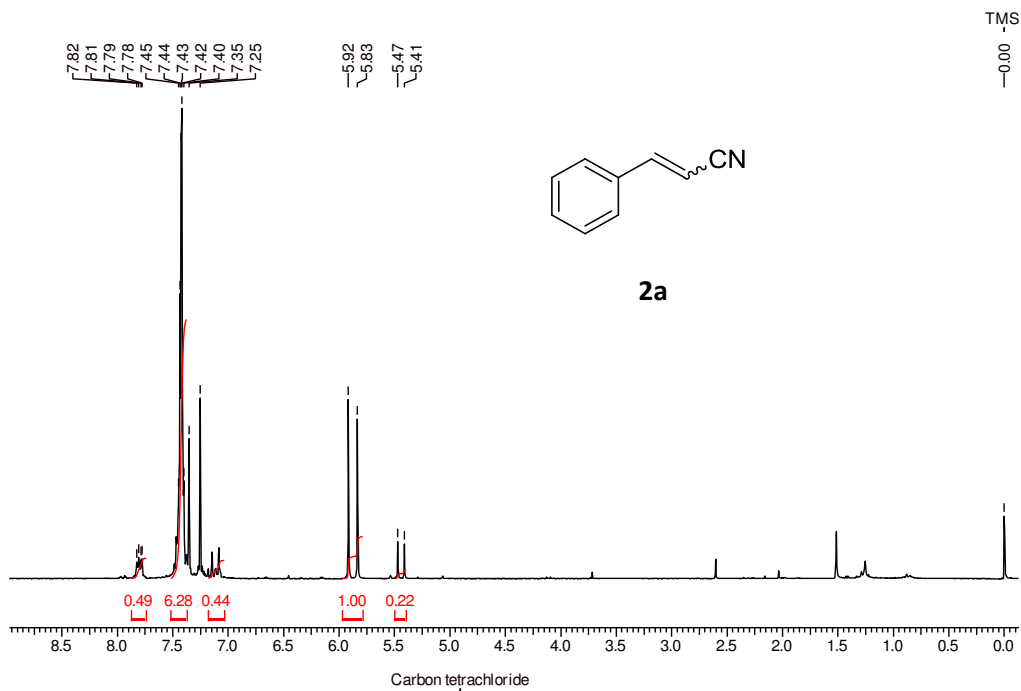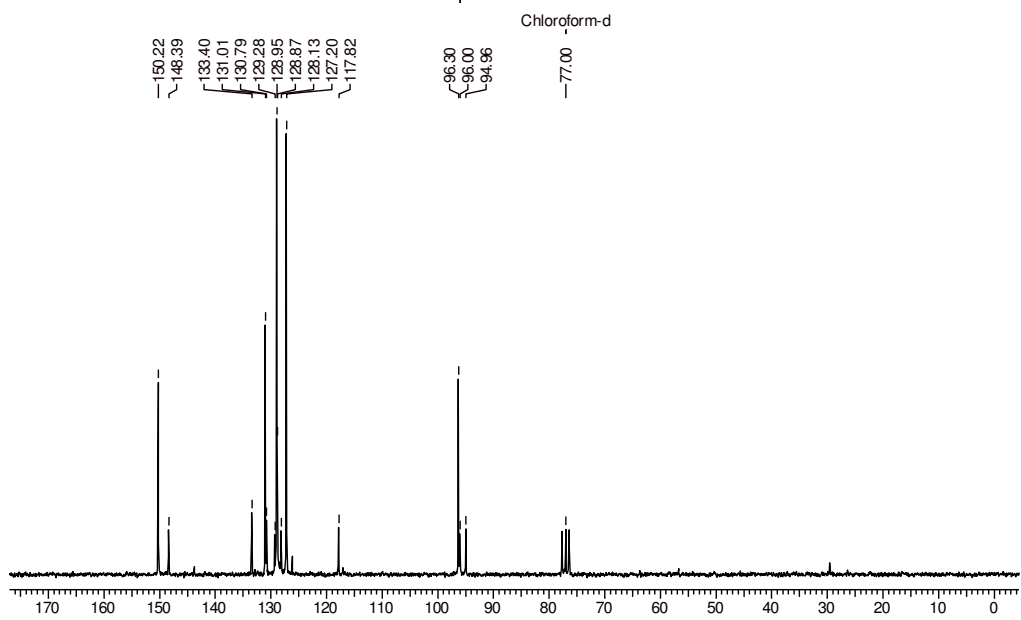

**<sup>1</sup>H and <sup>13</sup>C NMR spectra of 2a**

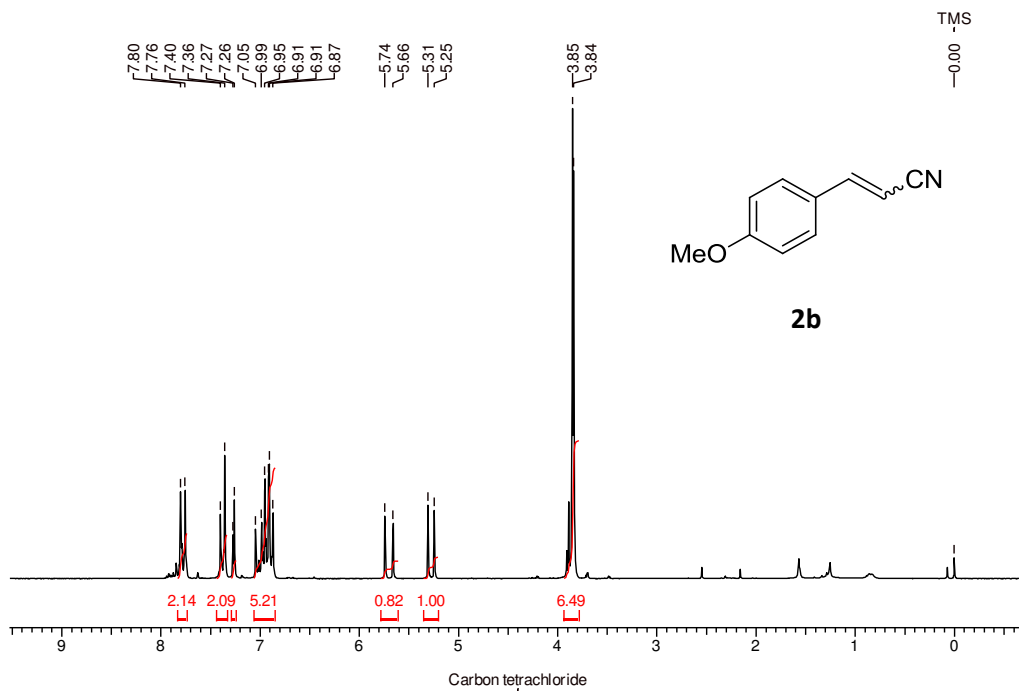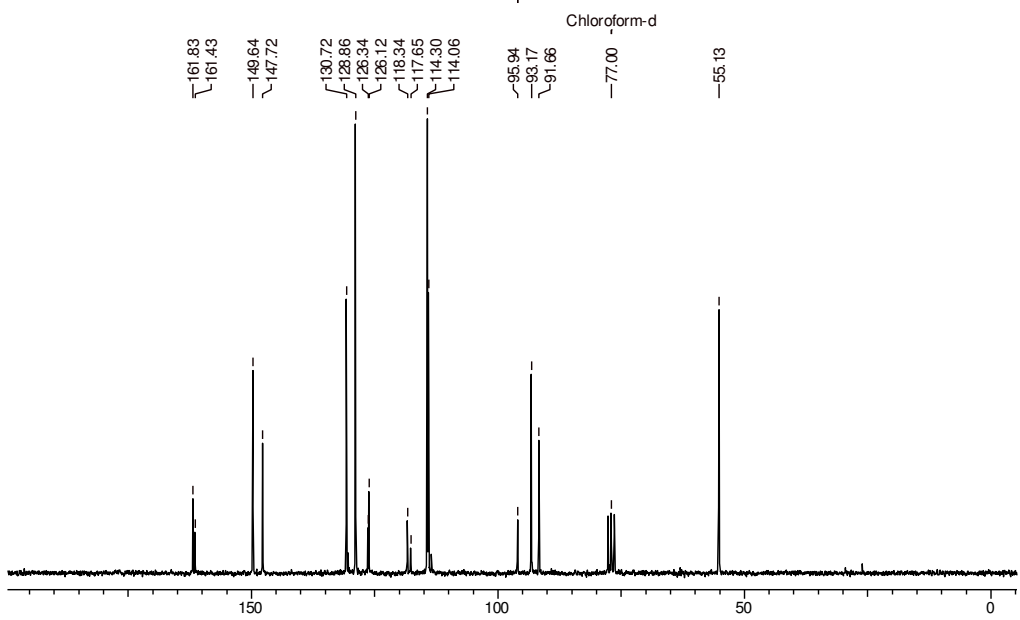

**<sup>1</sup>H and <sup>13</sup>C NMR spectra of 2b**

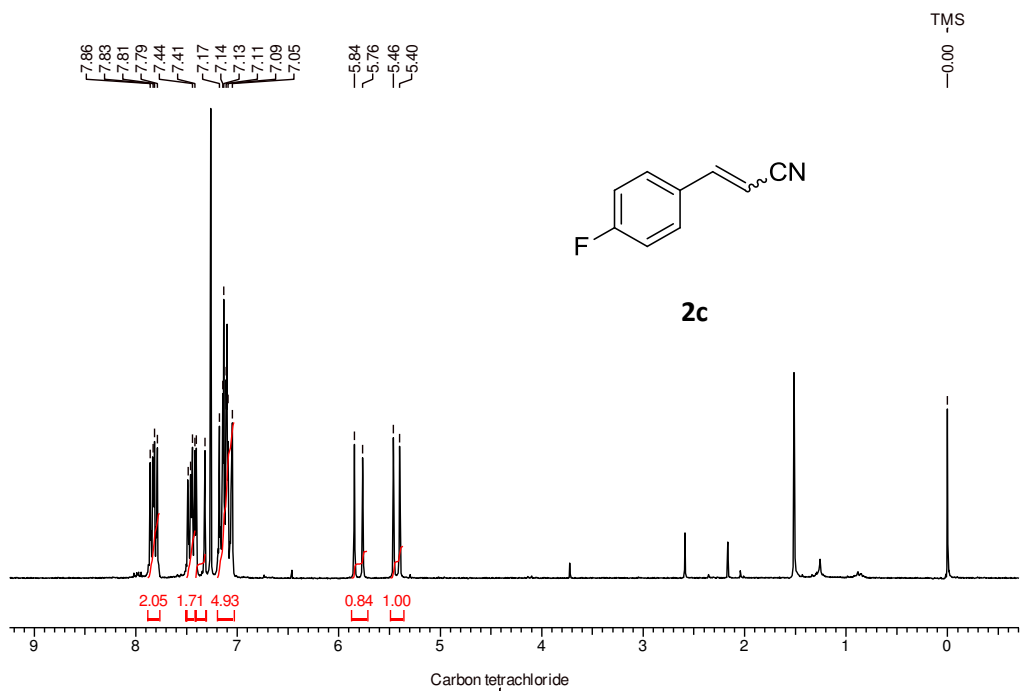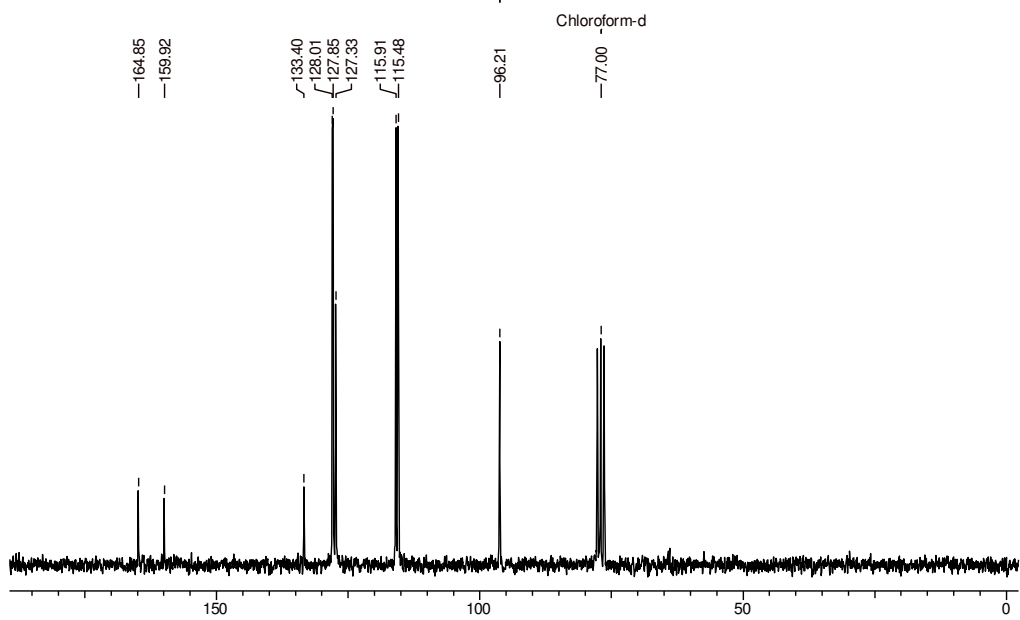

**<sup>1</sup>H and <sup>13</sup>C NMR spectra of 2c**

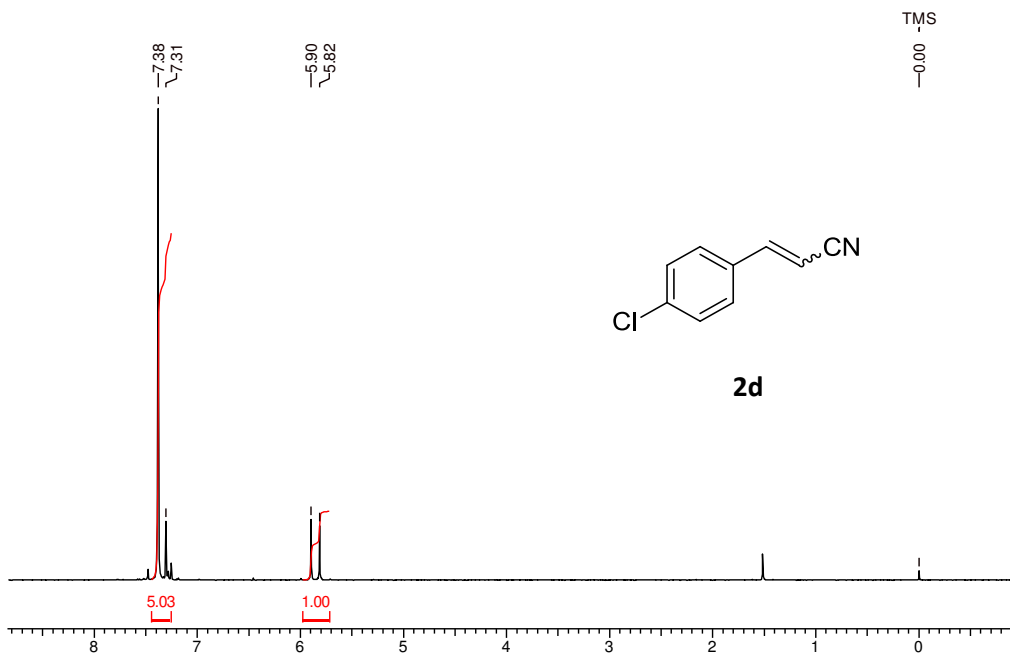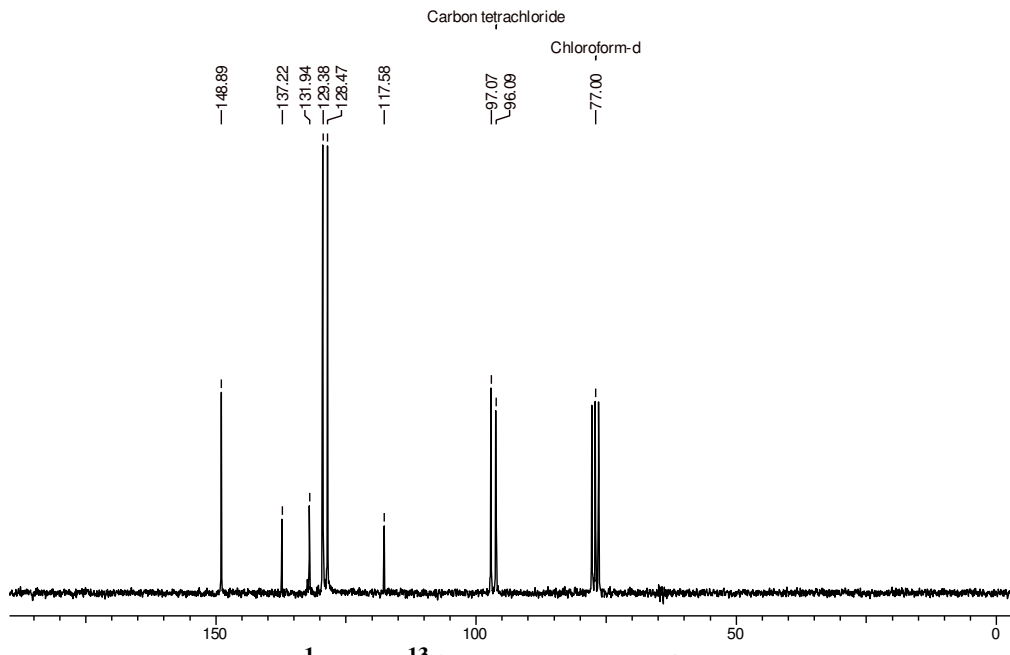

**<sup>1</sup>H and <sup>13</sup>C NMR spectra of 2d**

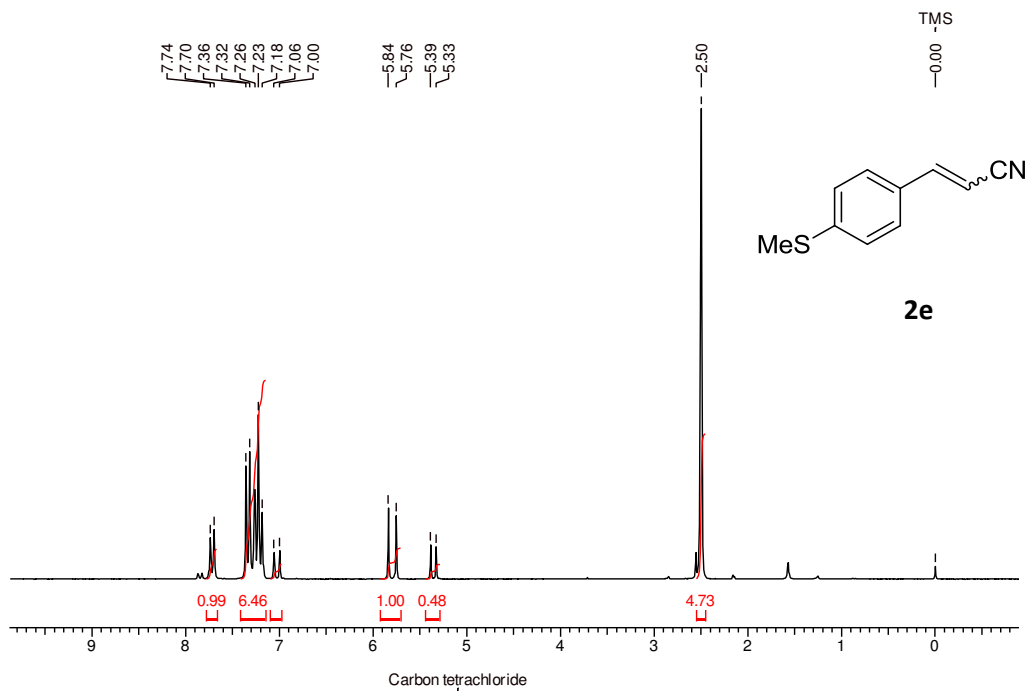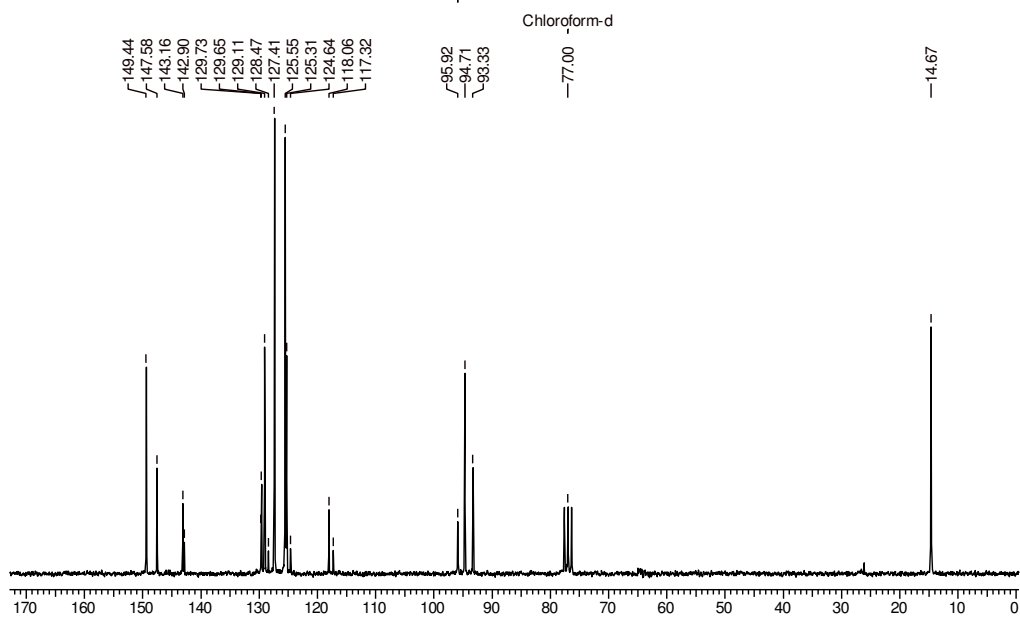

**<sup>1</sup>H and <sup>13</sup>C NMR spectra of 2e**

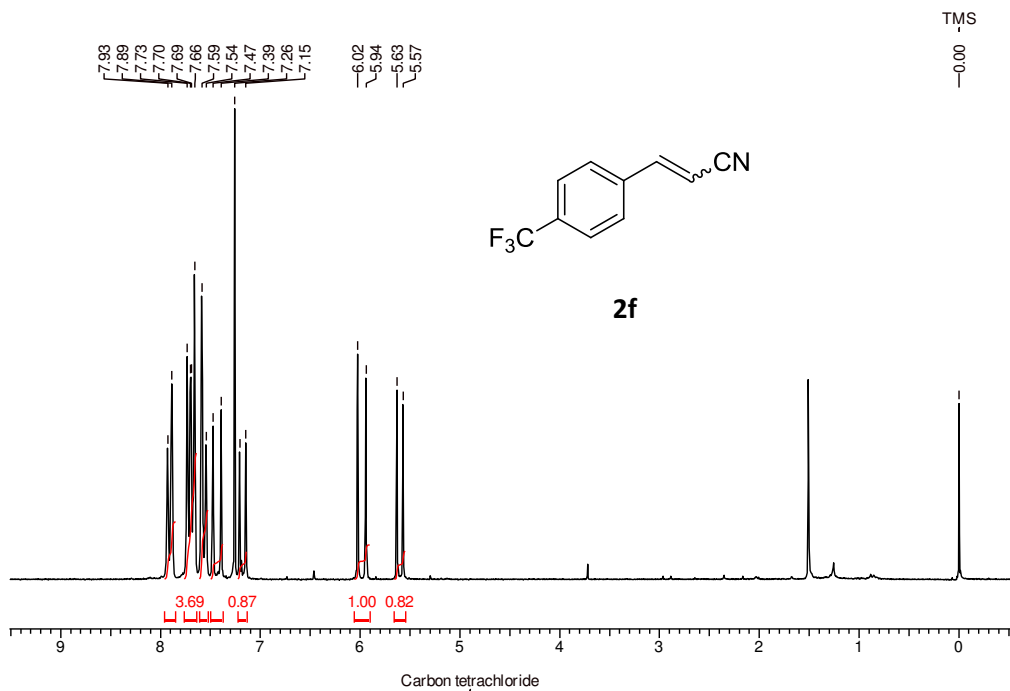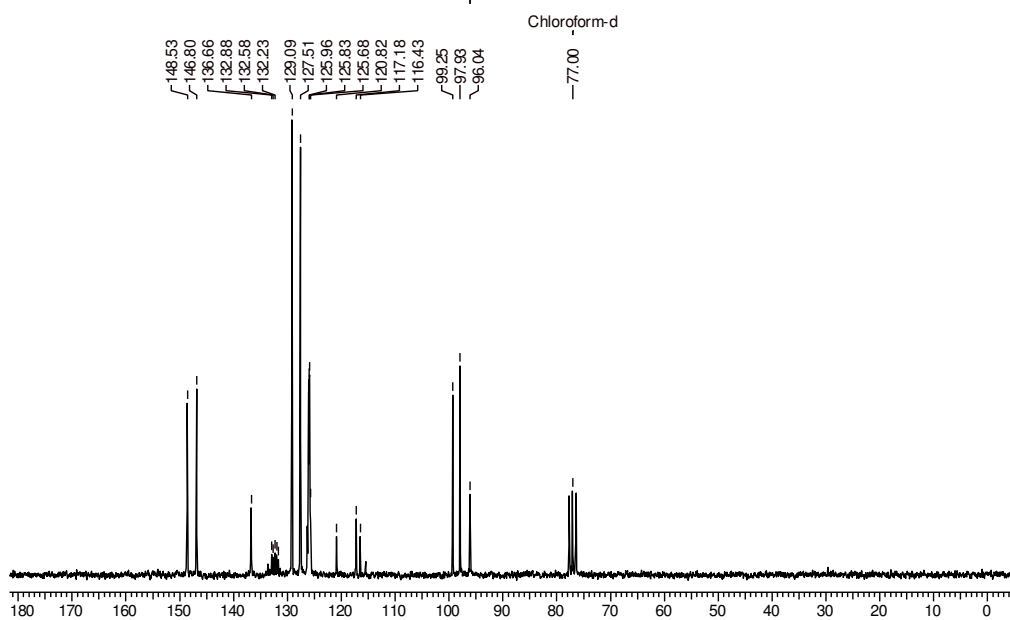

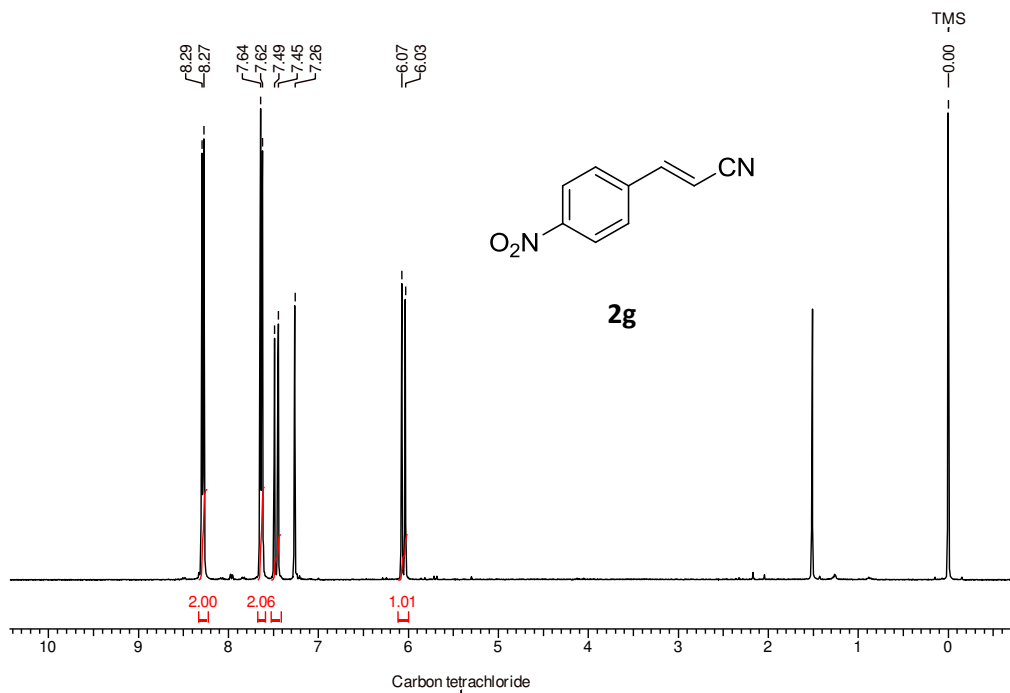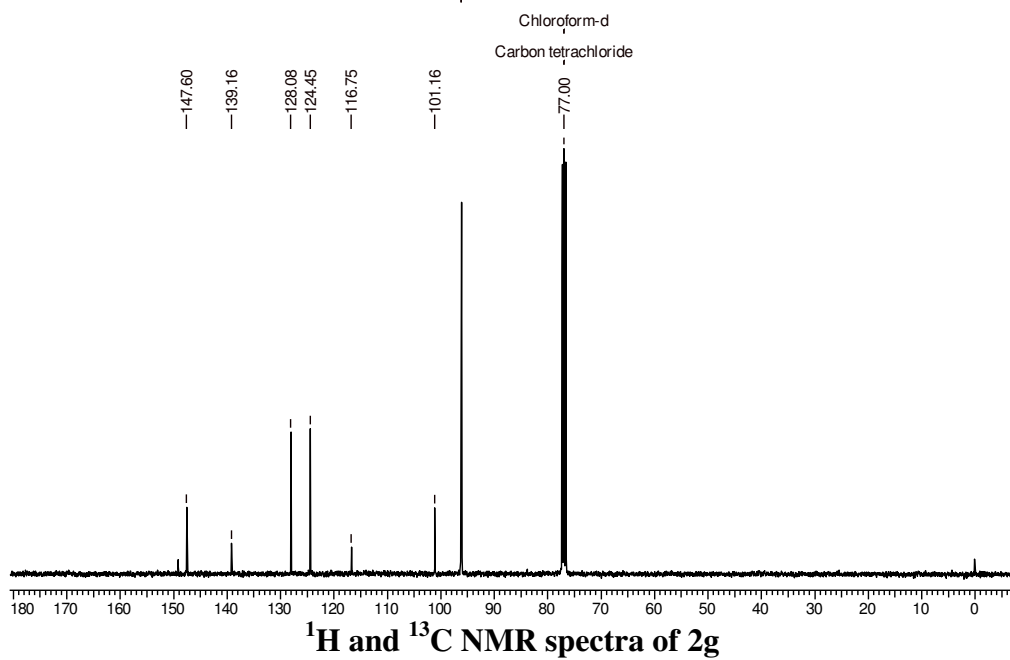



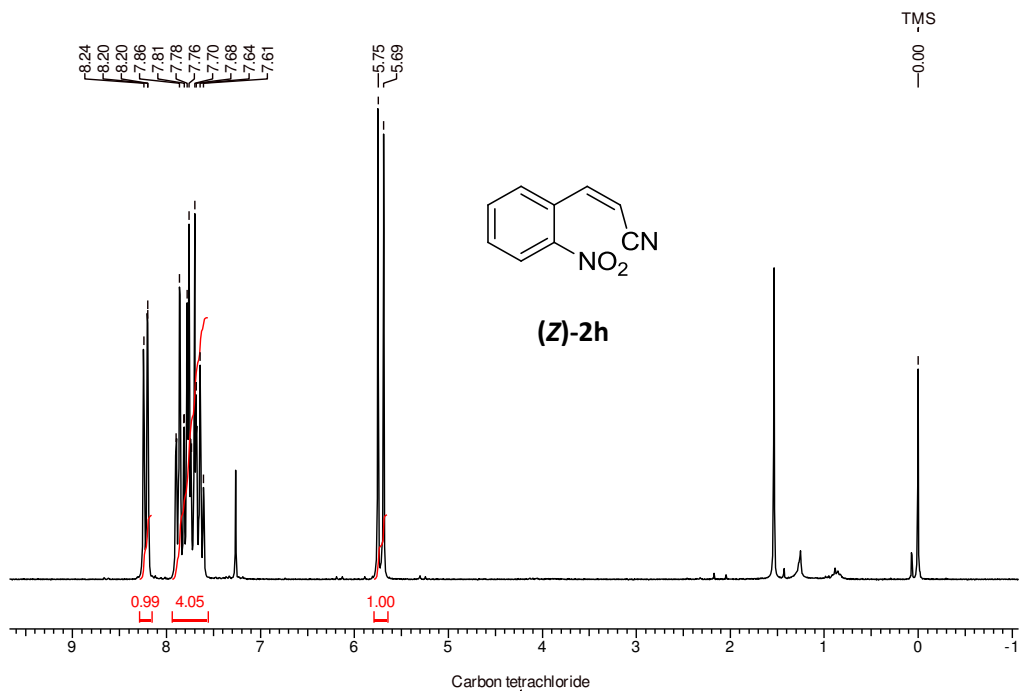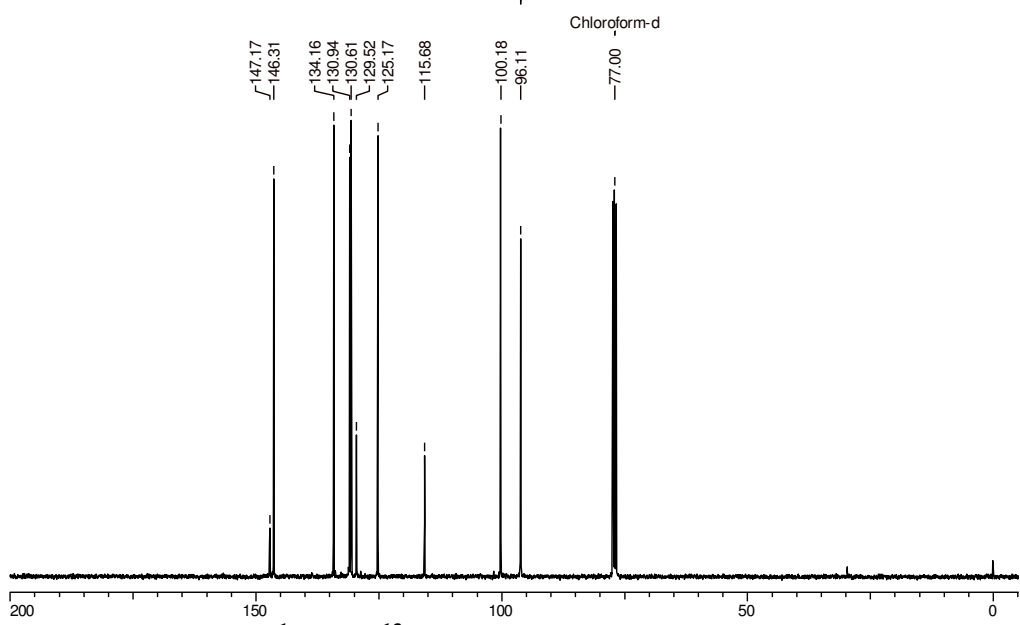

**<sup>1</sup>H and <sup>13</sup>C NMR spectra of (Z)-2h**

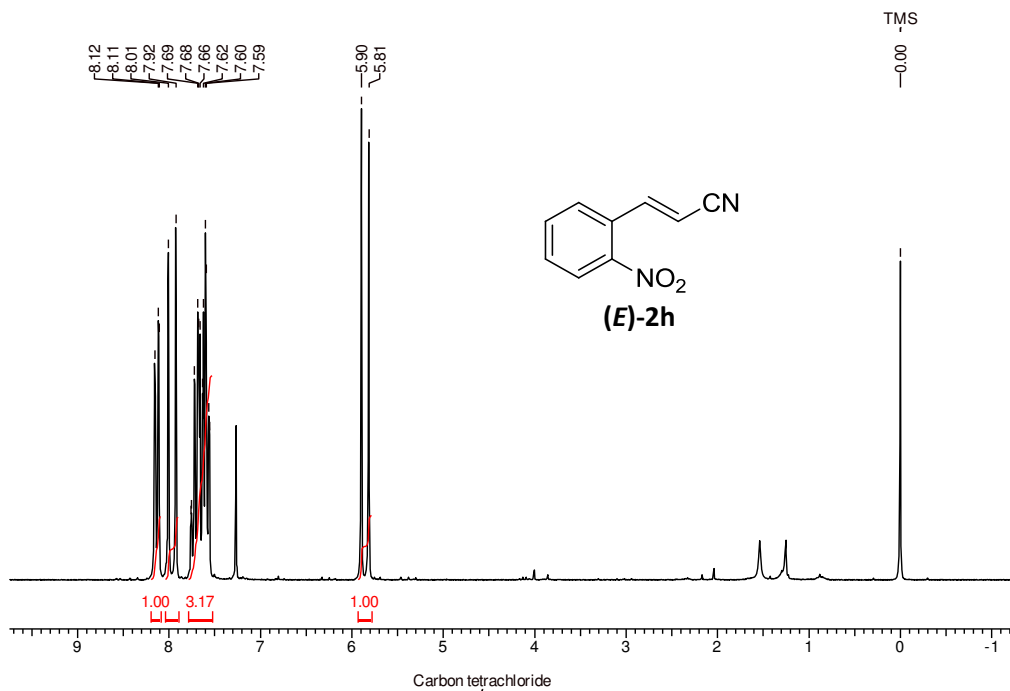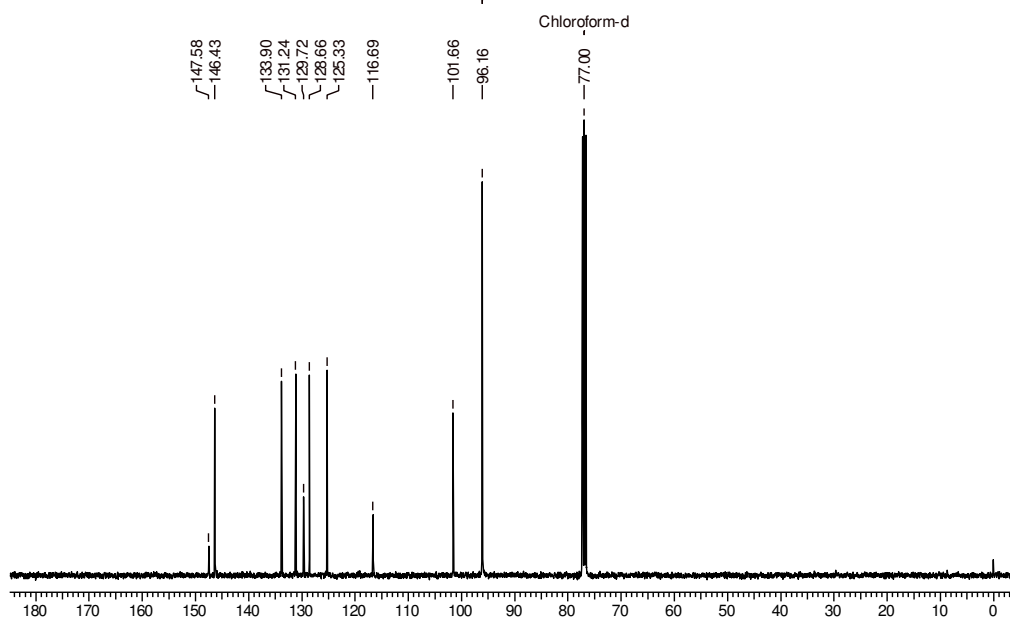

**<sup>1</sup>H and <sup>13</sup>C NMR spectra of (E)-2h**

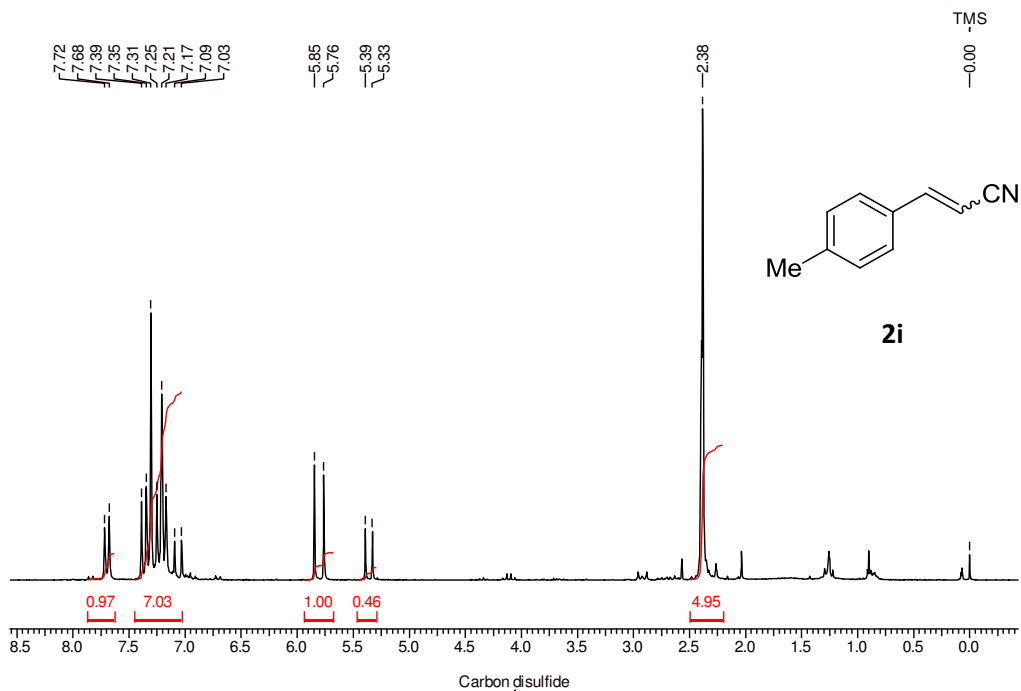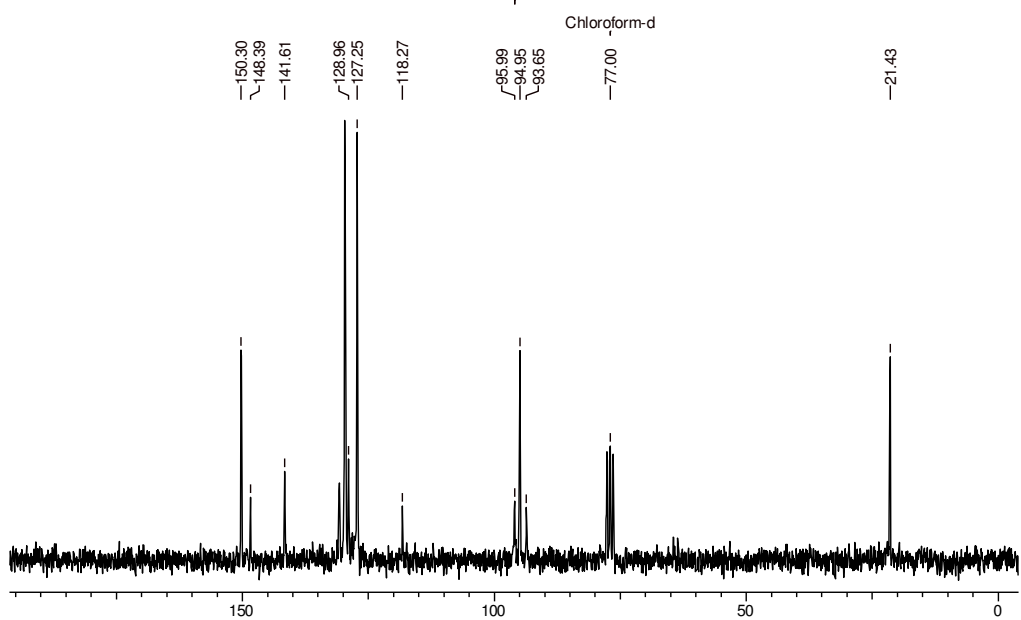

**<sup>1</sup>H and <sup>13</sup>C NMR spectra of 2i**

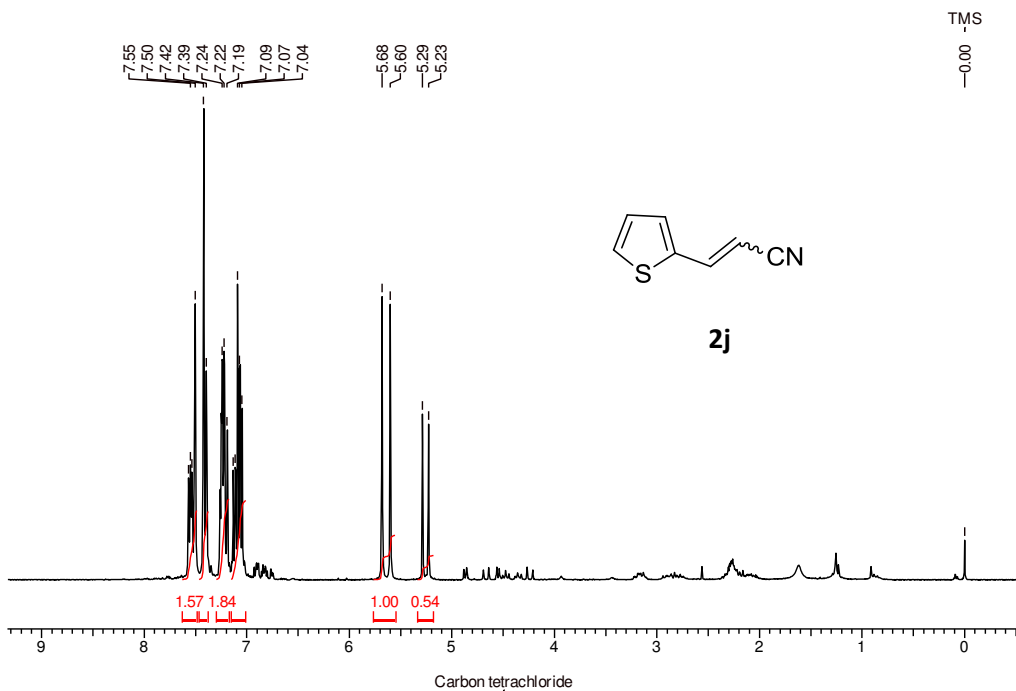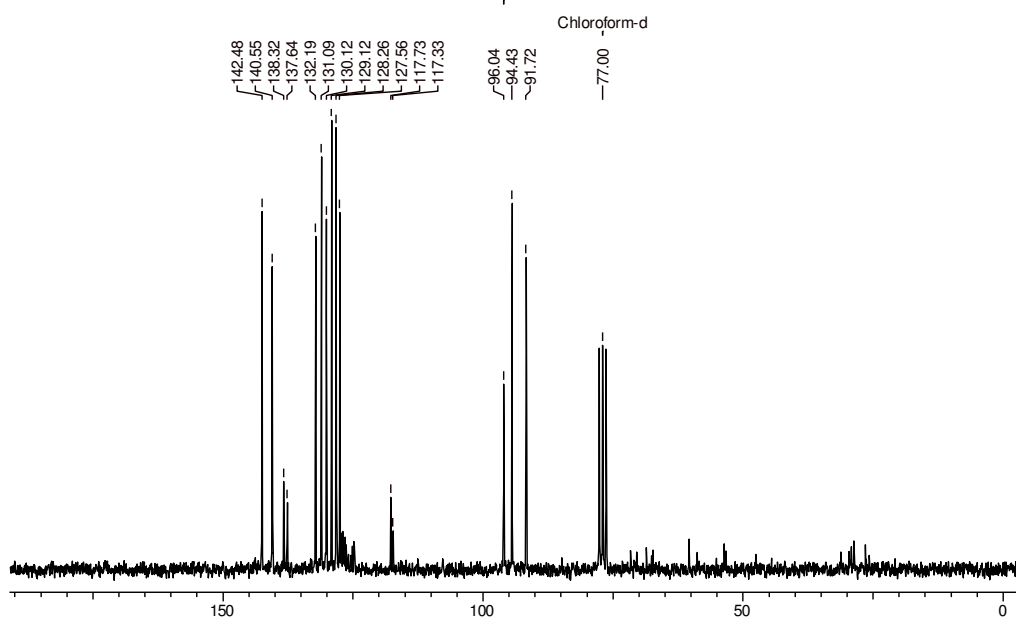

**<sup>1</sup>H and <sup>13</sup>C NMR spectra of 2j**

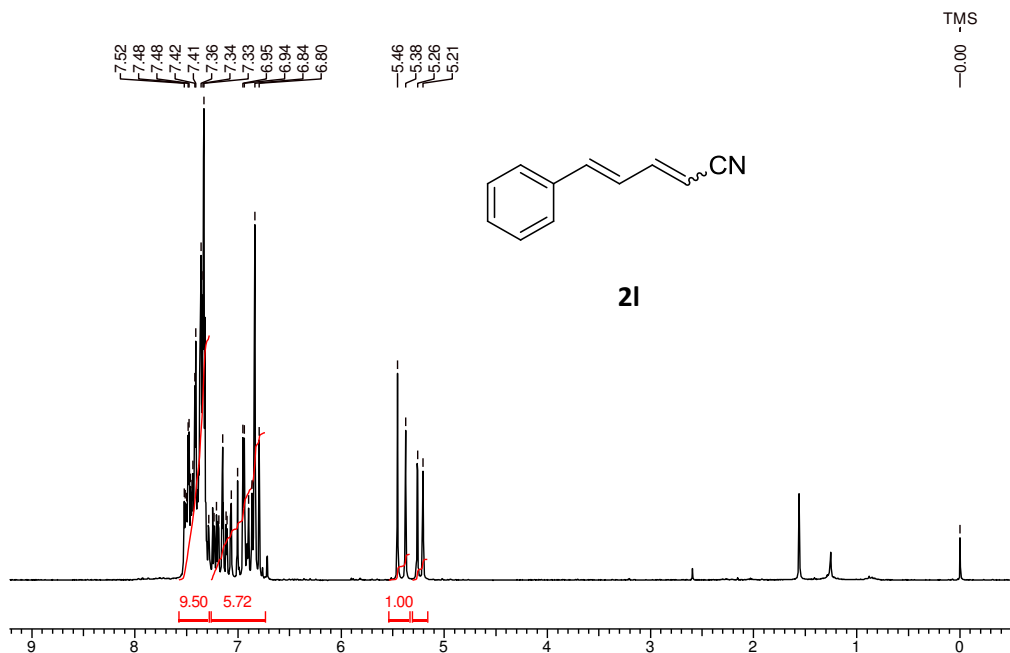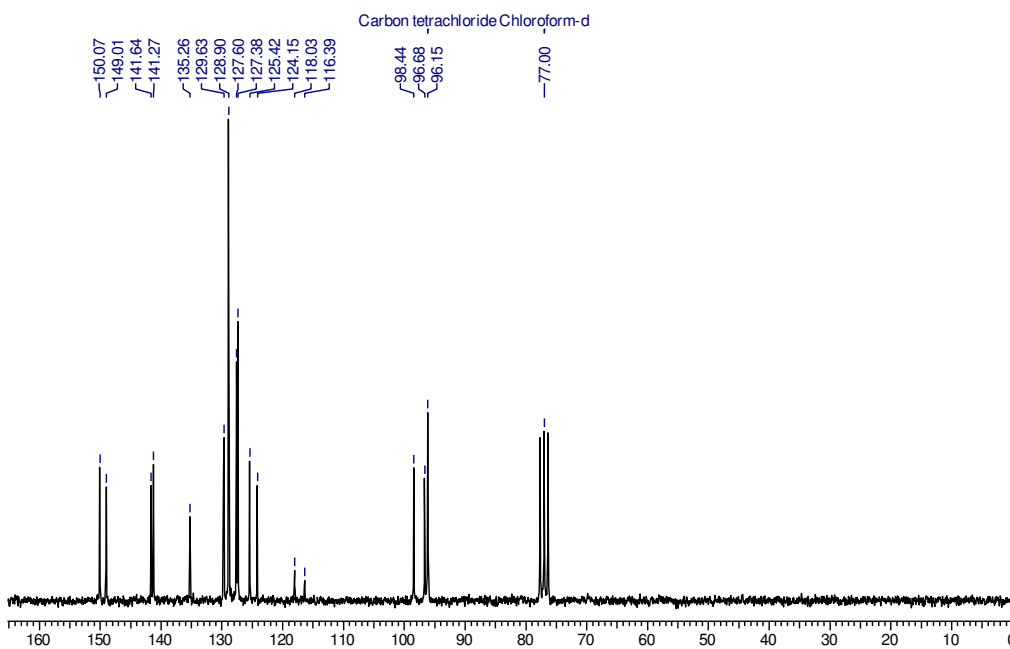

**$^1\text{H}$  and  $^{13}\text{C}$  NMR spectra of 21**

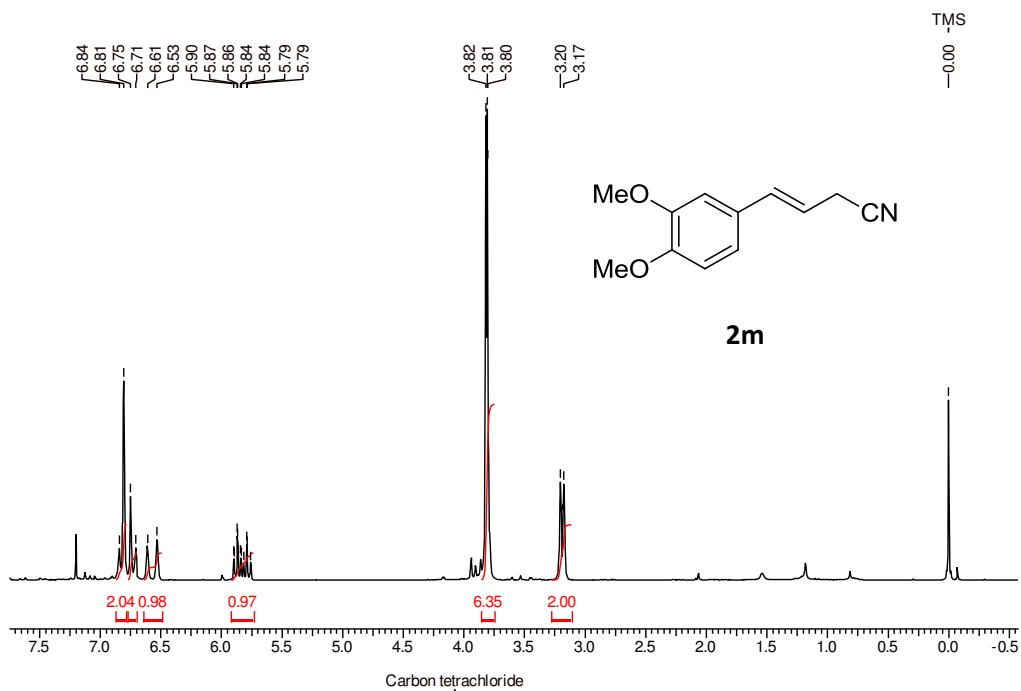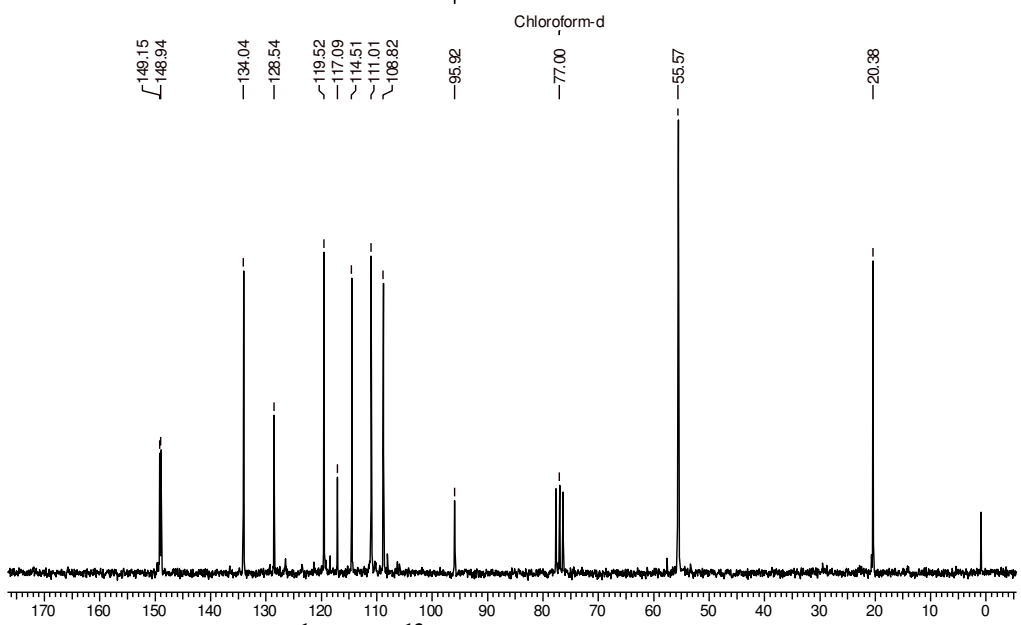

**<sup>1</sup>H and <sup>13</sup>C NMR spectra of 2m**

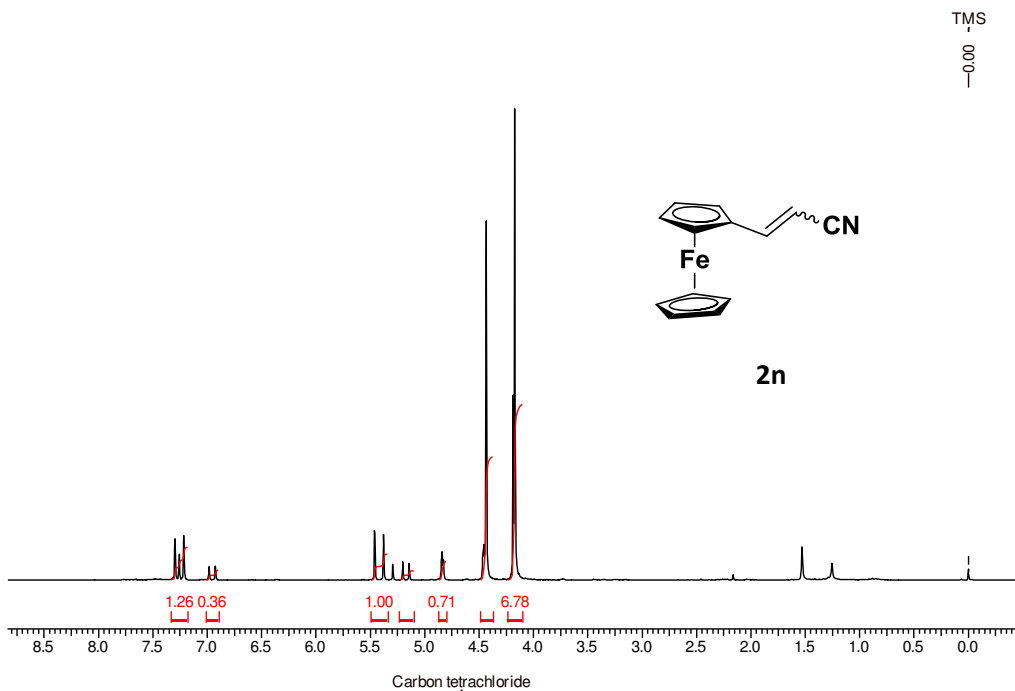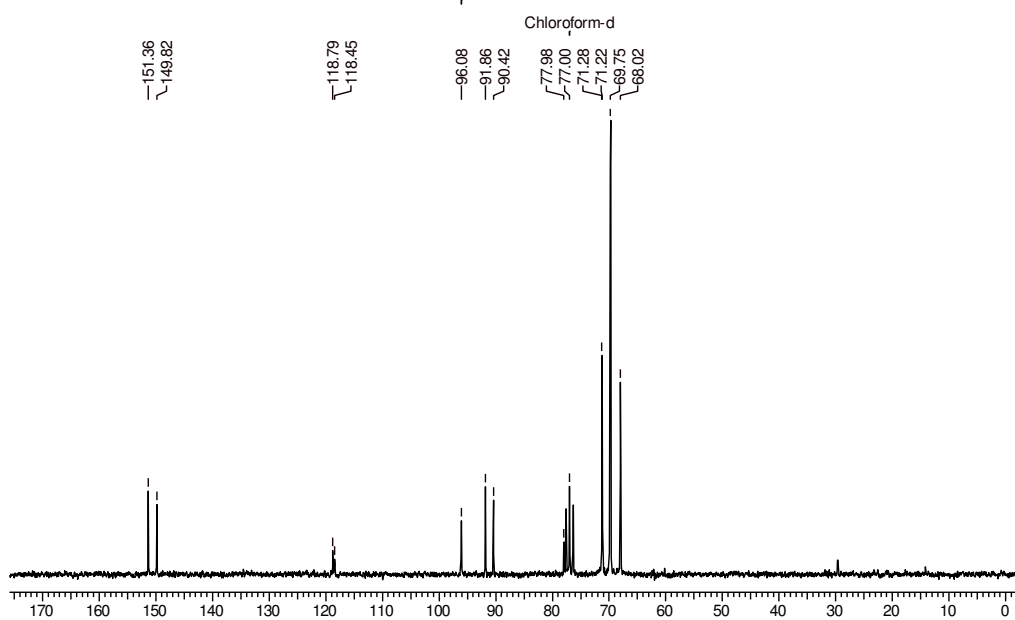

**$^1\text{H}$  and  $^{13}\text{C}$  NMR spectra of 2n**

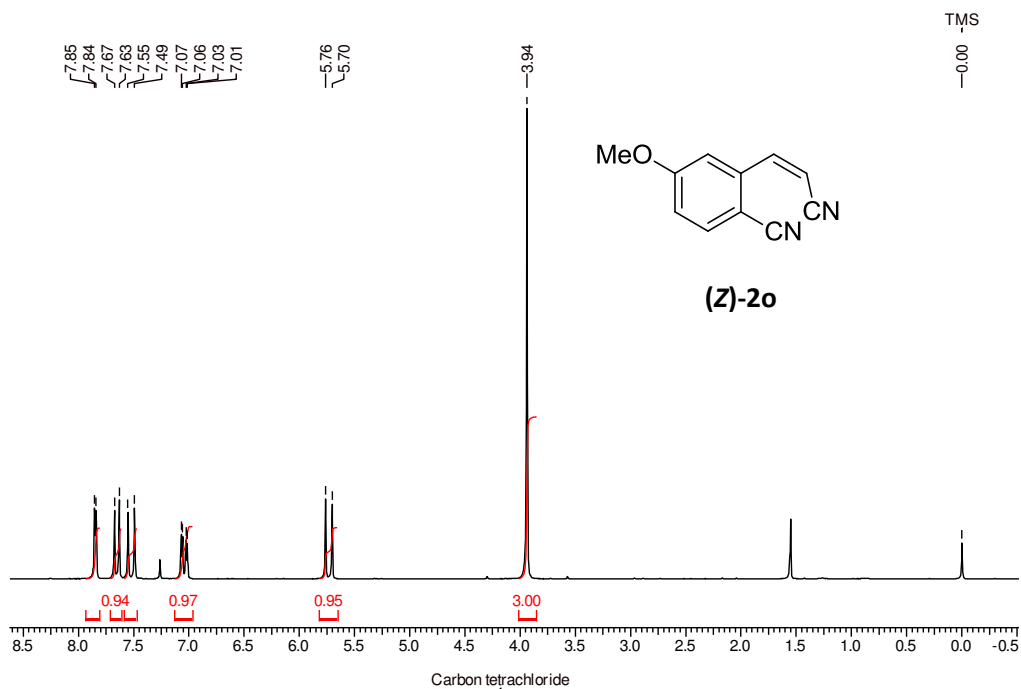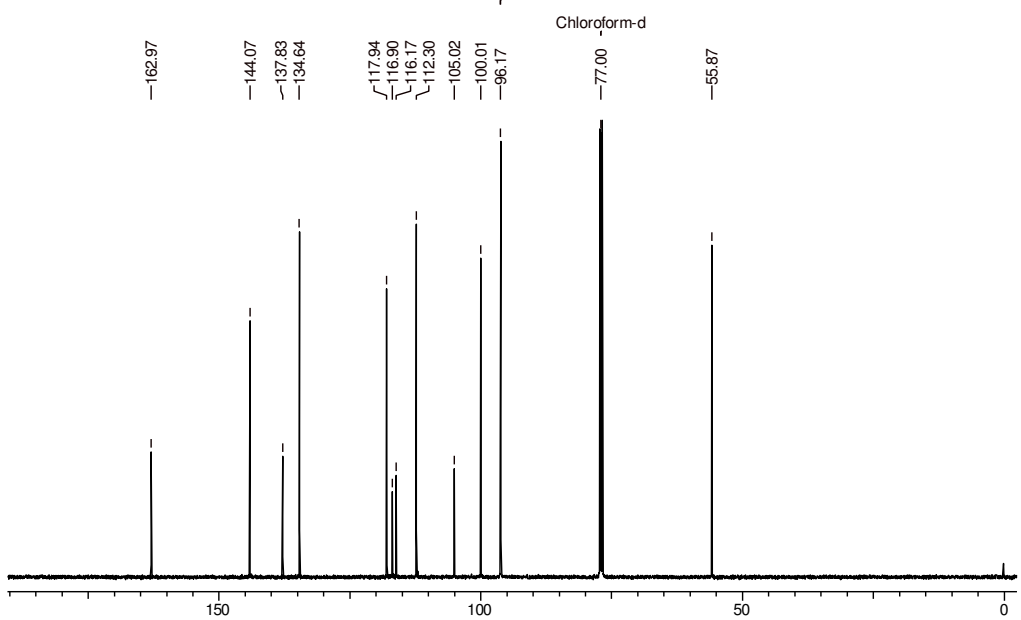

**<sup>1</sup>H and <sup>13</sup>C NMR spectra of (Z)-2o**



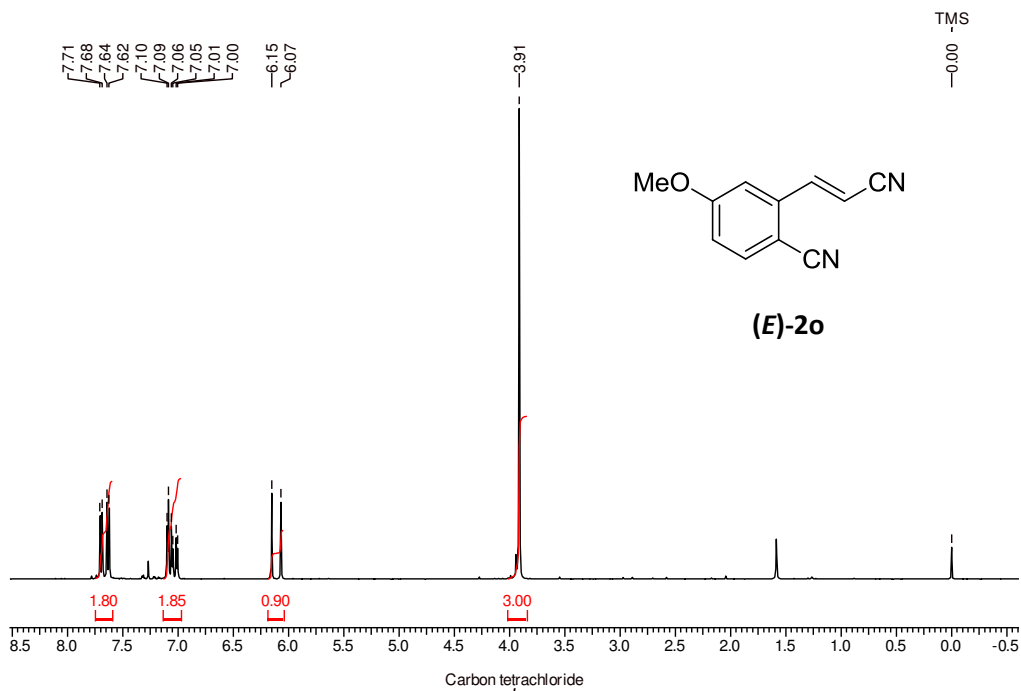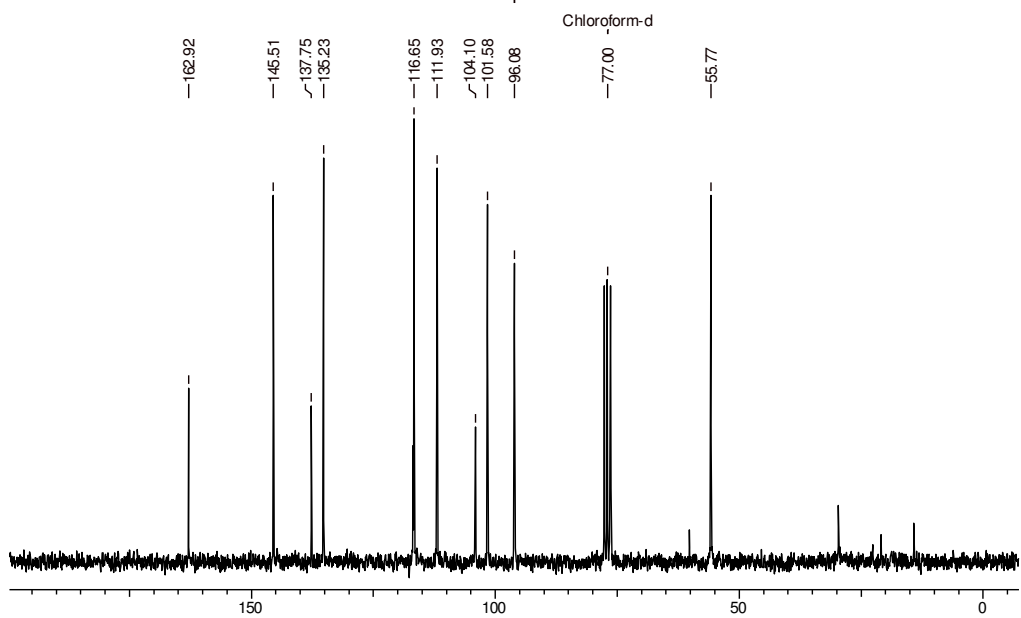

**<sup>1</sup>H and <sup>13</sup>C NMR spectra of (E)-2o**

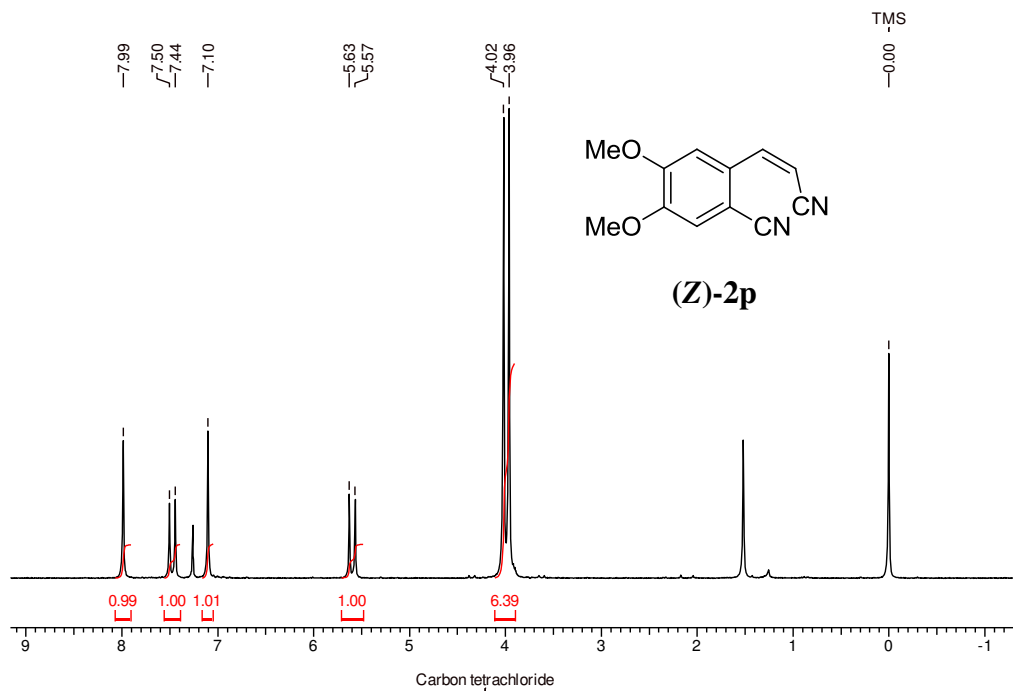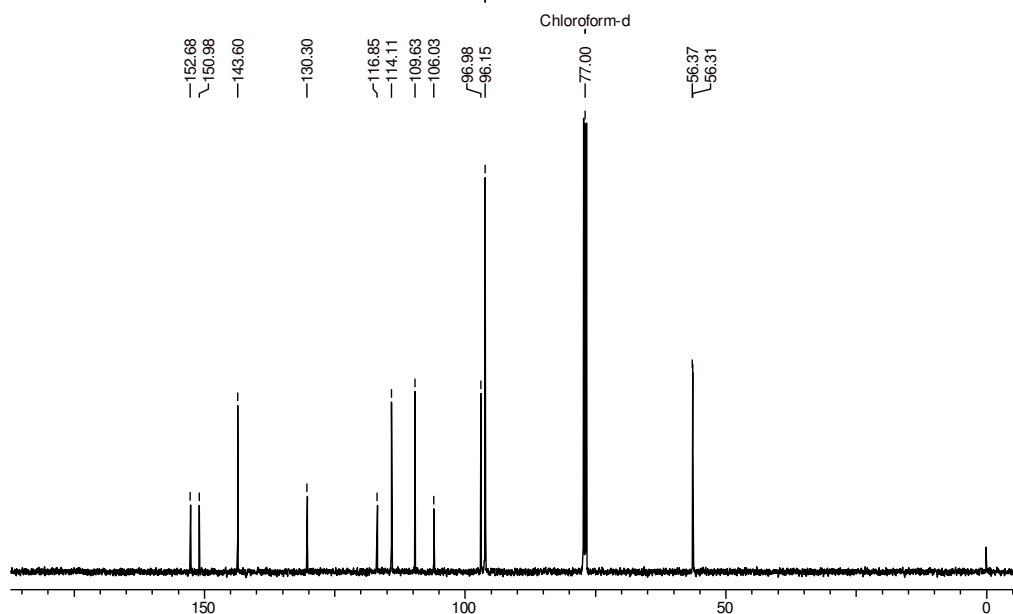

**<sup>1</sup>H and <sup>13</sup>C NMR spectra of (Z)-2p**

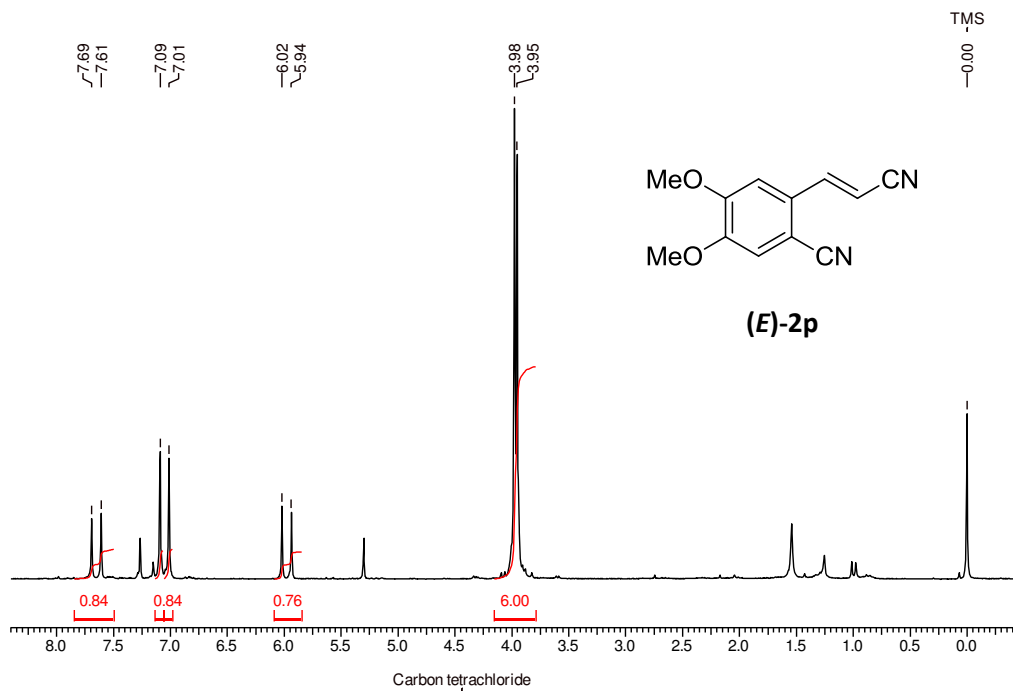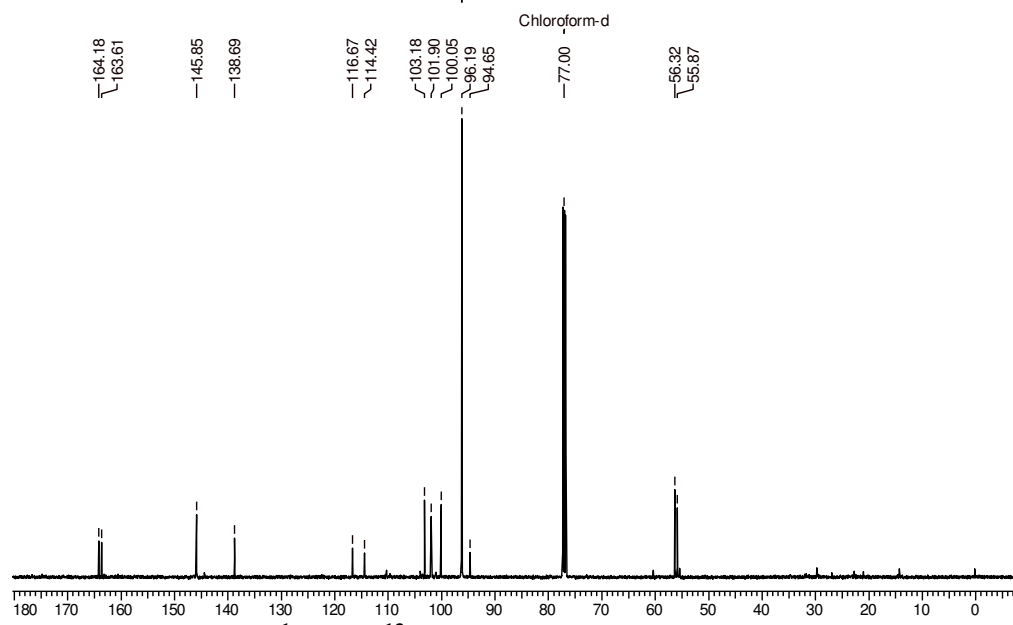

**<sup>1</sup>H and <sup>13</sup>C NMR spectra of *(E)*-2p**

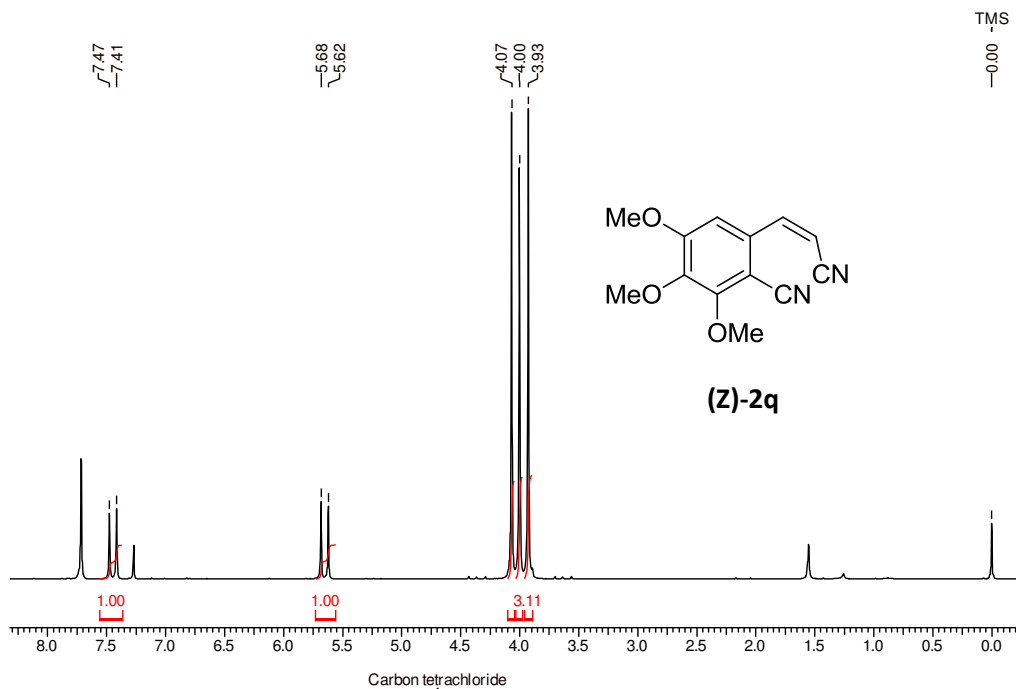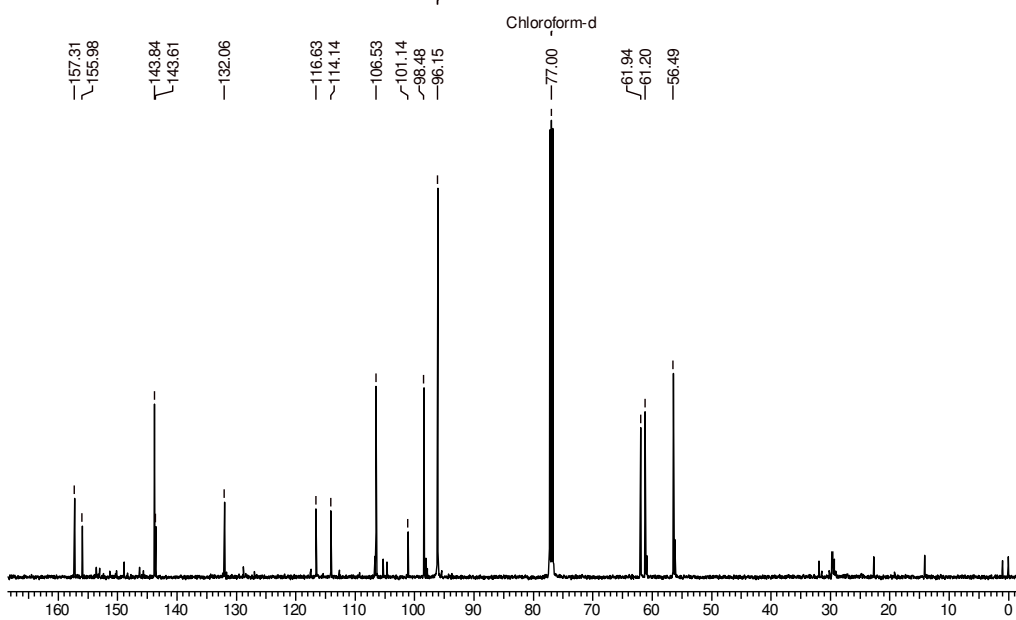

<sup>1</sup>H and <sup>13</sup>C NMR spectra of (Z)-2q

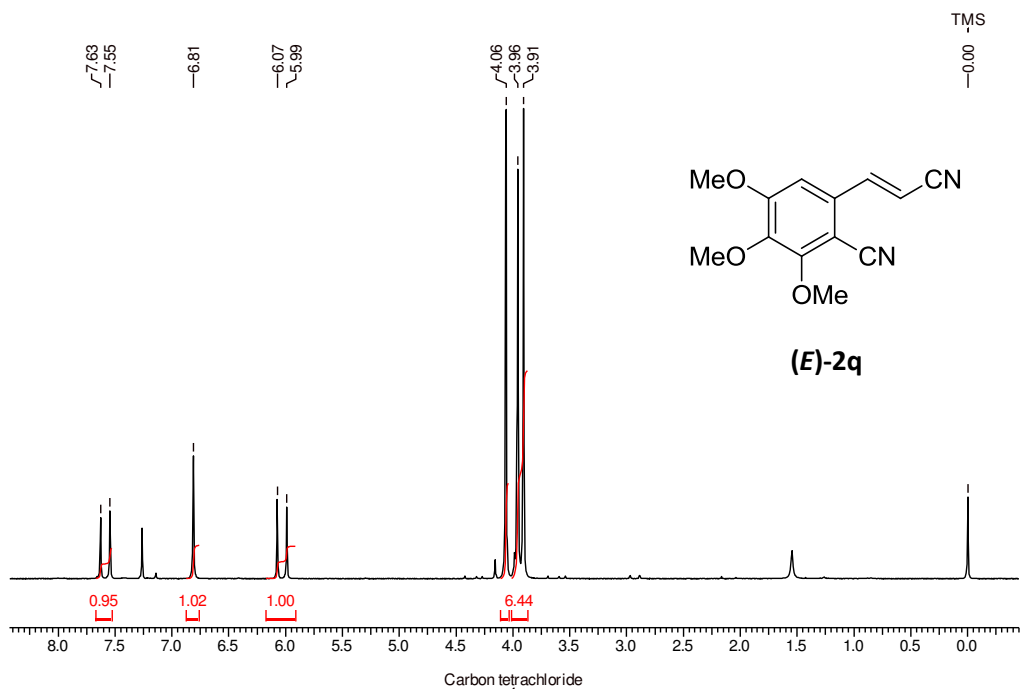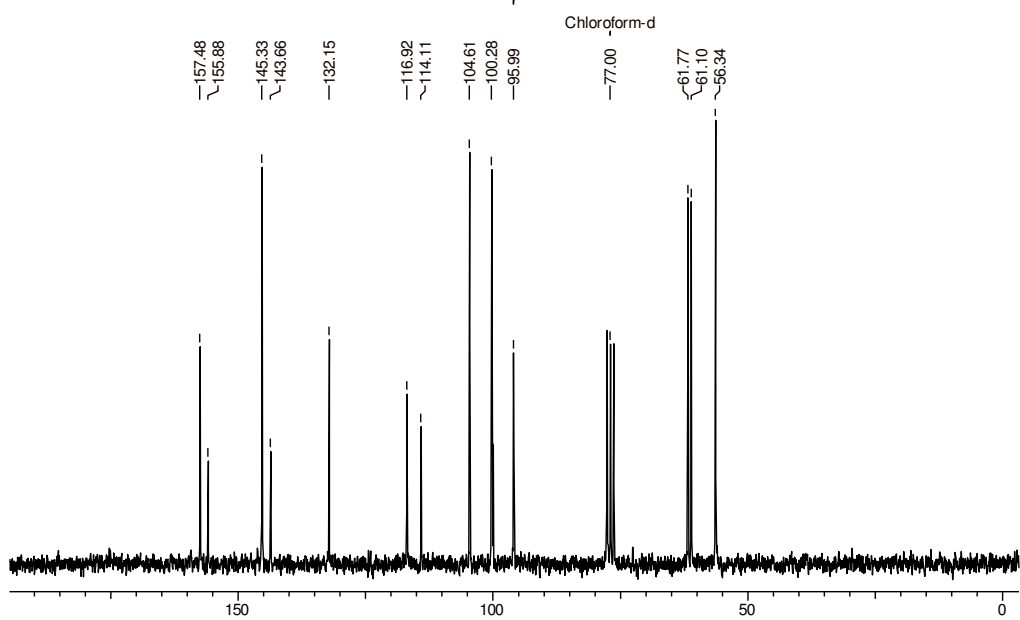

**<sup>1</sup>H and <sup>13</sup>C NMR spectra of *(E)*-2q**

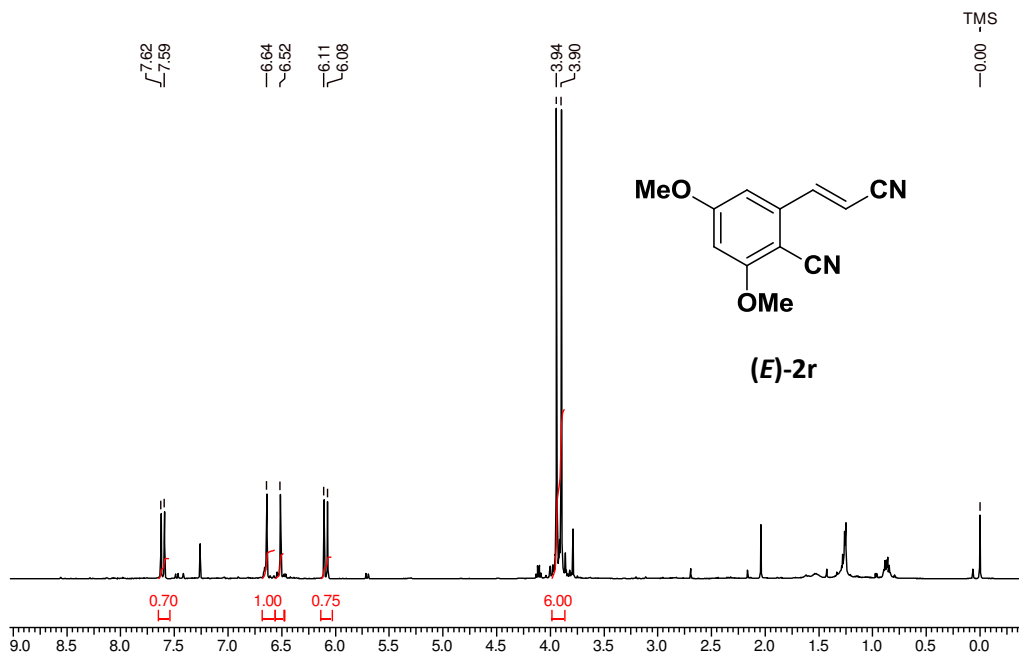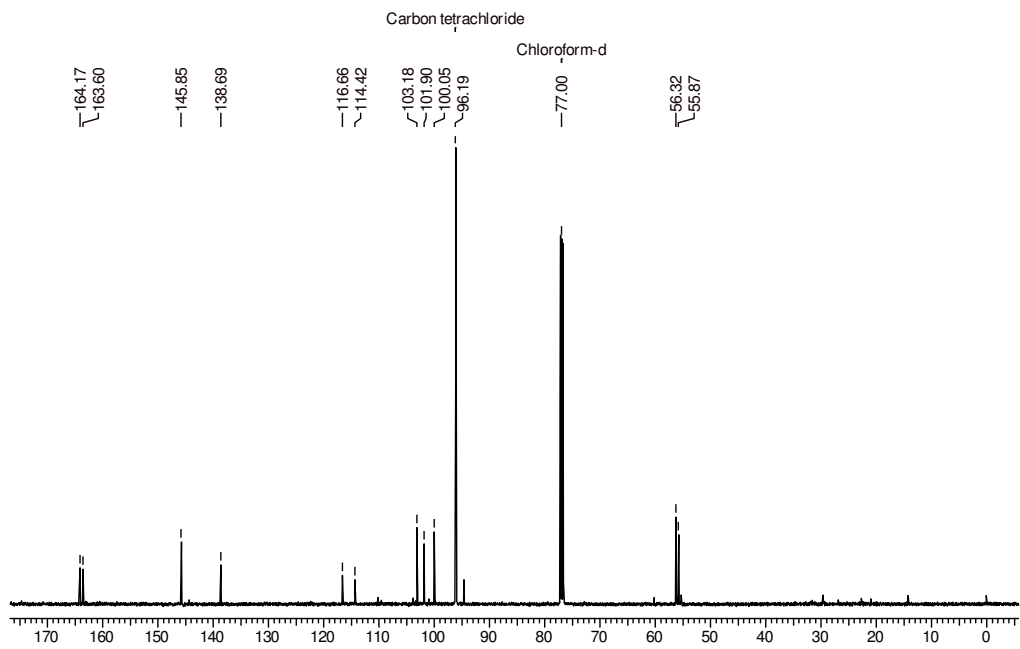

<sup>1</sup>H and <sup>13</sup>C NMR spectra of *(E)*-2r

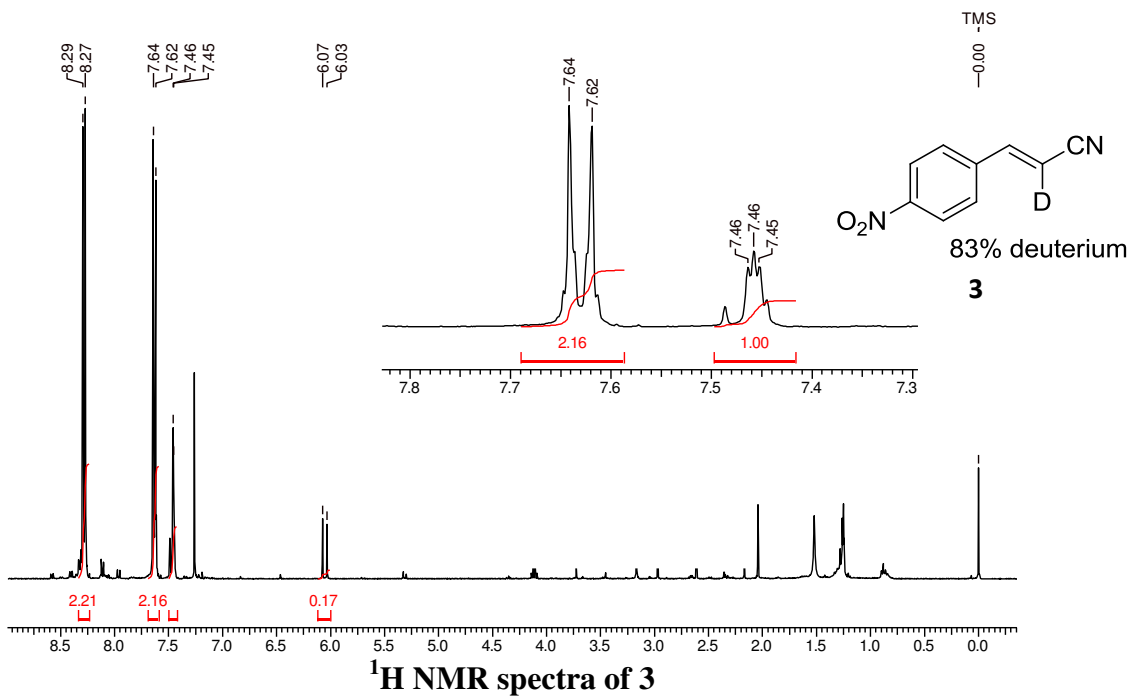

Supplement: c5ob00394f1.pdf [file c5ob00394f1.pdf]
